# Supplementary material for: Adjunctive Bright Light Therapy for Non-Seasonal Major Depressive Disorder: A Randomized Controlled Trial
Source: MDPI journal article supplement (doi:10.3390/ijerph191912430), 2022-09-29
Supplement: s1 [file s1]

## Supplementary Materials

Table S1. The subscales of HAMD-17 and their items

| Number | HAMD-17 items                        | Bech-6 | Maier-6 | Gibbons-8 | Santen-7 | Anxiety-6 | Retardation-4 |
|--------|--------------------------------------|--------|---------|-----------|----------|-----------|---------------|
| 1      | Depressed mood                       | •      | •       | •         | •        |           | •             |
| 2      | Feelings of guilt                    | •      | •       | •         | •        |           |               |
| 3      | Suicide                              |        |         | •         | •        |           |               |
| 4      | Insomnia-early                       |        |         |           |          |           |               |
| 5      | Insomnia-middle                      |        |         |           |          |           |               |
| 6      | Insomnia-late                        |        |         |           |          |           |               |
| 7      | Work and activities                  | •      | •       | •         | •        |           | •             |
| 8      | Retardation                          | •      | •       |           | •        |           | •             |
| 9      | Agitation                            |        | •       | •         |          |           |               |
| 10     | Anxiety-psychic                      | •      | •       | •         | •        | •         |               |
| 11     | Anxiety-somatic                      |        |         | •         |          | •         |               |
| 12     | Somatic<br>symptoms-gastrointestinal |        |         |           |          | •         |               |
| 13     | Somatic<br>symptoms-general          | •      |         |           | •        | •         |               |
| 14     | Genital symptoms                     |        |         | •         |          |           | •             |
| 15     | Hypochondriasis                      |        |         |           |          | •         |               |
| 16     | Loss of weight                       |        |         |           |          |           |               |
| 17     | Loss of insight                      |        |         |           |          | •         |               |

HAMD-17: Hamilton Depression Rating Scale-17 items; Bech: Bech melancholia scale; Maier: Maier–Philipp severity subscale; Gibbons: Gibbons global depression severity scale; Santen: Santen scale; Anxiety: anxiety subscale; Retardation: retardation subscale.

Table S2. Outcome measures (subscales of HAM-D-17) in treating major depressive disorder over time using bright light therapy ( $n = 22$ ) and dim red-light ( $n = 21$ )

|         |      | Total score     |                 | $p$  | Change of score |                | $p$  | Response    |              | $p$  |
|---------|------|-----------------|-----------------|------|-----------------|----------------|------|-------------|--------------|------|
|         |      | BLT             | DRL             |      | BLT             | DRL            |      | BLT         | DRL          |      |
| Outcome | Week | Mean<br>(SD)    | Mean<br>(SD)    |      | Mean<br>(SD)    | Mean<br>(SD)   |      | $n$<br>(%)  | $n$<br>(%)   |      |
| Bech    | 0    | 10.23<br>(2.11) | 9.67<br>(2.37)  | 0.42 |                 |                |      |             |              |      |
|         | 1    | 9.23<br>(2.51)  | 7.86<br>(2.97)  | 0.11 | 1.00<br>(1.72)  | 1.81<br>(2.80) | 0.26 | 1<br>(4.50) | 1<br>(4.80)  | 1.00 |
|         | 2    | 7.86<br>(2.85)  | 7.57<br>(2.96)  | 0.74 | 2.36<br>(2.74)  | 2.10<br>(3.00) | 0.76 | 4<br>(18.2) | 4<br>(19.0)  | 1.00 |
|         | 4    | 7.00<br>(3.27)  | 6.62<br>(3.34)  | 0.71 | 3.23<br>(2.83)  | 3.05<br>(4.21) | 0.87 | 8<br>(36.4) | 9<br>(42.9)  | 0.66 |
| Maier   | 0    | 9.73<br>(2.43)  | 9.05<br>(2.77)  | 0.40 |                 |                |      |             |              |      |
|         | 1    | 8.82<br>(2.75)  | 7.38<br>(3.01)  | 0.11 | 0.91<br>(2.05)  | 1.67<br>(2.96) | 0.33 | 1<br>(4.5)  | 1<br>(4.8)   | 0.97 |
|         | 2    | 7.32<br>(2.90)  | 7.29<br>(3.45)  | 0.97 | 2.41<br>(3.10)  | 1.76<br>(3.36) | 0.52 | 4<br>(18.2) | 3<br>(14.3)  | 1.00 |
|         | 4    | 6.55<br>(3.08)  | 6.19<br>(3.67)  | 0.73 | 3.18<br>(3.08)  | 2.86<br>(4.51) | 0.78 | 9<br>(40.9) | 10<br>(47.6) | 0.66 |
| Gibbons | 0    | 13.00<br>(3.41) | 12.00<br>(4.07) | 0.39 |                 |                |      |             |              |      |
|         | 1    | 11.32<br>(3.70) | 9.29<br>(4.38)  | 0.11 | 1.68<br>(2.89)  | 2.71<br>(3.77) | 0.32 | 2<br>(9.1)  | 2<br>(9.5)   | 1.00 |
|         | 2    | 9.73<br>(3.68)  | 8.81<br>(4.83)  | 0.49 | 3.27<br>(4.09)  | 3.19<br>(4.23) | 0.95 | 5<br>(22.7) | 6<br>(28.6)  | 0.66 |
|         | 4    | 8.64<br>(3.89)  | 8.29<br>(5.35)  | 0.81 | 4.36<br>(3.75)  | 3.71<br>(5.92) | 0.67 | 9<br>(40.9) | 8<br>(38.1)  | 0.85 |
| Santen  | 0    | 12<br>(2.64)    | 11.43<br>(2.73) | 0.49 |                 |                |      |             |              |      |
|         | 1    | 10.36<br>(3.03) | 8.95<br>(3.46)  | 0.16 | 1.64<br>(1.97)  | 2.48<br>(3.36) | 0.32 | 1<br>(4.5)  | 1<br>(4.8)   | 1.00 |
|         | 2    | 8.95<br>(3.05)  | 8.57<br>(3.57)  | 0.71 | 3.05<br>(3.27)  | 2.86<br>(3.58) | 0.86 | 4<br>(18.2) | 4<br>(19.0)  | 0.94 |
|         | 4    | 8.00<br>(3.87)  | 7.90<br>(4.00)  | 0.94 | 4.00<br>(3.52)  | 3.52<br>(4.90) | 0.72 | 7<br>(31.8) | 9<br>(42.9)  | 0.45 |

|                    |   |                |                |      |                |                |      |              |             |      |
|--------------------|---|----------------|----------------|------|----------------|----------------|------|--------------|-------------|------|
| <b>Anxiety</b>     | 0 | 6.95<br>(1.82) | 6.33<br>(2.44) | 0.35 |                |                |      |              |             |      |
|                    | 1 | 6.00<br>(1.75) | 5.05<br>(2.27) | 0.13 | 0.95<br>(1.73) | 1.29<br>(1.77) | 0.54 | 1<br>(4.50)  | 2<br>(9.50) | 0.61 |
|                    | 2 | 5.32<br>(2.12) | 4.43<br>(2.48) | 0.21 | 1.64<br>(2.13) | 1.90<br>(1.58) | 0.64 | 4<br>(18.20) | 6<br>(28.6) | 0.49 |
|                    | 4 | 4.77<br>(2.33) | 4.67<br>(2.87) | 0.90 | 2.18<br>(2.06) | 1.67<br>(2.13) | 0.43 | 7<br>(31.8)  | 7<br>(33.3) | 0.92 |
| <b>Retardation</b> | 0 | 6.45<br>(1.71) | 6.24<br>(1.76) | 0.69 |                |                |      |              |             |      |
|                    | 1 | 6.05<br>(1.70) | 5.24<br>(2.00) | 0.16 | 0.41<br>(1.18) | 1.00<br>(1.95) | 0.23 | 0<br>(0)     | 3<br>(14.3) | 0.11 |
|                    | 2 | 5.27<br>(2.03) | 5.33<br>(1.74) | 0.72 | 1.18<br>(1.89) | 0.90<br>(1.95) | 0.64 | 4<br>(18.2)  | 2<br>(9.5)  | 0.66 |
|                    | 4 | 4.73<br>(2.31) | 4.67<br>(2.08) | 0.93 | 1.73<br>(2.43) | 1.57<br>(2.84) | 0.85 | 7<br>(31.8)  | 6<br>(28.6) | 0.82 |

HAMD-17: Hamilton Depression Rating Scale-17 items; Bech: Bech melancholia scale; Maier: Maier–Philipp severity subscale; Gibbons: Gibbons global depression severity scale; Santen: Santen scale; Anxiety: anxiety subscale; Retardation: retardation subscale; SD: standard deviation.

Table S3. Comparison of the effects on subscales of HAMD-17 in treating major depressive disorder for 4 weeks between bright light therapy and dim red-light groups, using hierarchical linear mixed-modeling<sup>a</sup> to show group effect, time effect, and interaction of group and time

| Outcome            | Group effect |               |          | Time effect |                |          | Group × time effect |               |          |
|--------------------|--------------|---------------|----------|-------------|----------------|----------|---------------------|---------------|----------|
|                    | <i>B</i>     | 95% CI        | <i>p</i> | <i>B</i>    | 95% CI         | <i>p</i> | <i>B</i>            | 95% CI        | <i>p</i> |
| <b>Bech</b>        | 1.22         | −0.40 to 2.8  | 0.14     | −0.62       | −0.03 to −0.20 | 0.04     | −0.49               | −1.31 to 0.32 | 0.23     |
| <b>Maier</b>       | 1.20         | −0.56 to 2.96 | 0.18     | −0.60       | −1.21 to 0.02  | 0.06     | −0.54               | −1.40 to 0.31 | 0.21     |
| <b>Gibbons</b>     | 2.17         | −0.21 to 4.56 | 0.07     | −0.50       | −1.28 to 0.28  | 0.20     | −0.84               | −1.93 to 0.24 | 0.13     |
| <b>Santen</b>      | 1.53         | −0.40 to 3.47 | 0.12     | −0.52       | −1.22 to 0.17  | 0.14     | −0.66               | −1.63 to 0.31 | 0.18     |
| <b>Anxiety</b>     | 1.19         | −0.09 to 2.48 | 0.07     | −0.19       | −0.63 to 0.25  | 0.39     | −0.42               | −1.04 to 0.19 | 0.18     |
| <b>Retardation</b> | 0.79         | −0.26 to 1.84 | 0.14     | −0.29       | −0.69 to 0.12  | 0.16     | −0.37               | −0.94 to 0.19 | 0.19     |

HAMD-17: Hamilton Depression Rating Scale-17 items; Bech: Bech melancholia scale; Maier: Maier–Philipp severity subscale; Gibbons: Gibbons global depression severity scale; Santen: Santen scale; Anxiety: anxiety subscale; Retardation: retardation subscale; 95% CI: 95% confidence interval; <sup>a</sup>Adjusted for age, gender, and baseline scores.
